# Supplementary material for: Label-free microRNA detection based on exchange-induced remnant magnetization
Source: Royal Society of Chemistry journal article supplement (doi:10.1039/c3cc40830b), 2013-01-01
Supplement: c3cc40830b.pdf [file c3cc40830b.pdf]

## Supporting Information

### Label-free microRNA detection based on exchange-induced remnant magnetization

Li Yao, Yuhong Wang and Shoujun Xu

#### Table of Contents:

Experimental details;

Signal of DNA exchange using M280 magnetic particles, with Fig. S1;

Signal of DNA exchange using T1 magnetic particles, with Fig. S2.

#### 1. Experimental details

The thiol-modified DNA or biotinylated RNA strands as Strand 1 were immobilized on the bottom surface of sample wells coated with gold or streptavidin, respectively. The concentrations of the DNA and RNA strands were 10  $\mu\text{M}$ . After hybridization with their corresponding biotinylated DNA/RNA strands (10  $\mu\text{M}$ ) with one mismatched base (Strand 2), the duplexes were incubated with streptavidin-conjugated magnetic particles (M280 or T1 beads, both from Invitrogen) at room temperature in tris-buffered saline (TBS) solution with 1% (w/v) bovine serum albumin (BSA) and 0.05% detergent Tween 20. The magnetic particles were then magnetized by approaching the pole face of a permanent magnet perpendicularly. The magnetization time was 2 min. The magnetic field at the surface of the magnet was approximately 0.5 T.

To start the exchange reaction, the label-free target DNA or miRNA (Strand 3) with complementary sequence to the immobilized Strand 1 was added in the sample well and incubated in TE buffer (10 mM tris, 1 mM EDTA, 1 M NaCl, pH 8.0) at 37 °C or room temperature. The magnetic measurements of the samples were obtained using an atomic magnetometer after applying a weak centrifugal force at 1000 rpm to eliminate physisorption of the magnetic particles. The home-built atomic magnetometer has been described previously (N. C. Garcia, D. Yu, L. Yao and S.-J. Xu, *Opt. Lett.*, 2010, **35**, 661-663.). The sensitivity of the atomic magnetometer was 150 fT/(Hz)<sup>1/2</sup>.

For the detection of miRNAs let-7a and let-7c, the two sample wells were mounted on a plastic sample holder with center-to-center distance of 14 mm. The reaction temperature was 37 °C. The melting point ( $T_m$ ) of the target DNA binding its complementary sequence was estimated to be 60.1 °C. The melting points of the let-7a and let-7c duplexes were estimated

to be 68.2 °C and 70.8 °C, respectively, under our experimental conditions. (Integrated DNA Technologies, <http://www.idtdna.com/analyzer/Applications/OligoAnalyzer/>)

## 2. Signal of DNA exchange using M280 magnetic particles

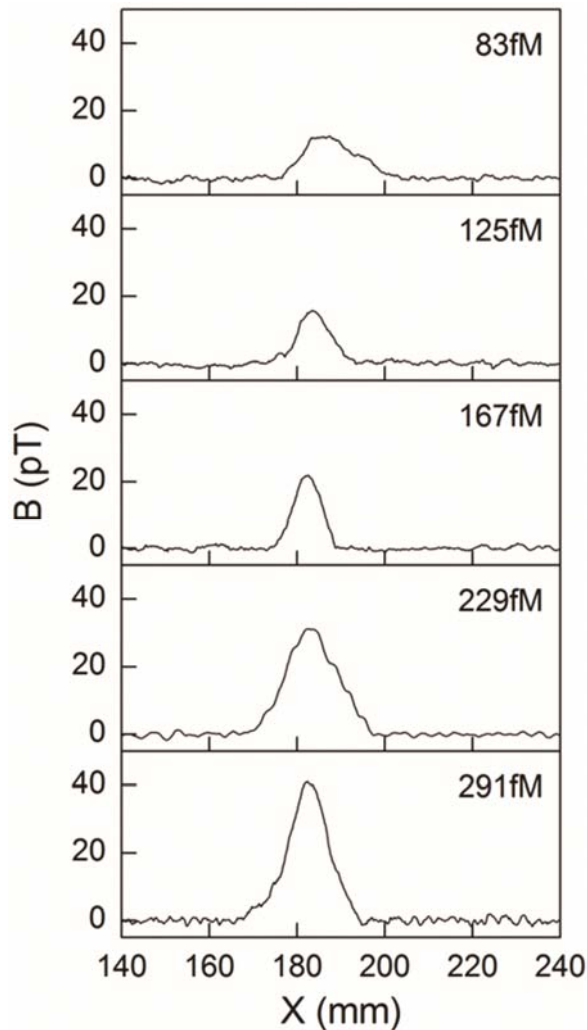

**Fig. S1** Magnetic field measurements for the exchange reactions involving 12-base DNA strands at five different concentrations. Magnetic particles M280 (~2.8- $\mu\text{m}$  diameter) were used. Each point on the profile has 1 s signal averaging time, obtained by averaging 33 adjacent data points in the raw data, where each data point was measured for 30 ms.

### 3. Signal of DNA exchange using T1 magnetic particles

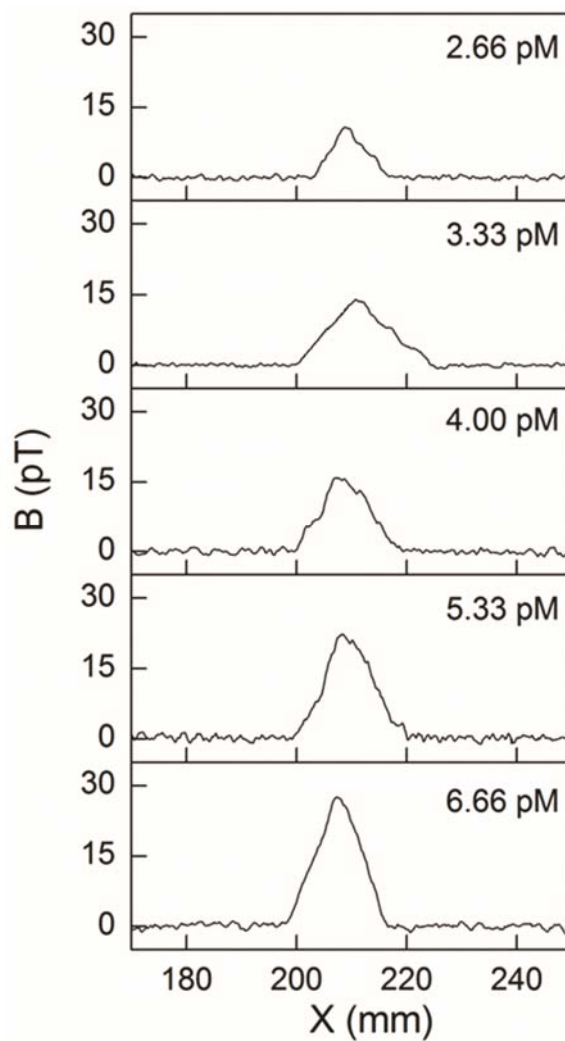

**Fig. S2** Magnetic field measurements for the exchange reactions involving 12-base DNA strands at five different concentrations. Magnetic particles T1 ( $\sim 1\text{-}\mu\text{m}$  diameter) were used. Each point on the profile has 1 s signal averaging time, obtained by averaging 33 adjacent data points in the raw data, where each data point was measured for 30 ms.
